# Supplementary material
Source: publisher figshare collection journal article supplement (https://frontiersin.figshare.com/ndownloader/files/13574669)
Supplement: Supplementary file [file 13574669]

# Supplementary Information

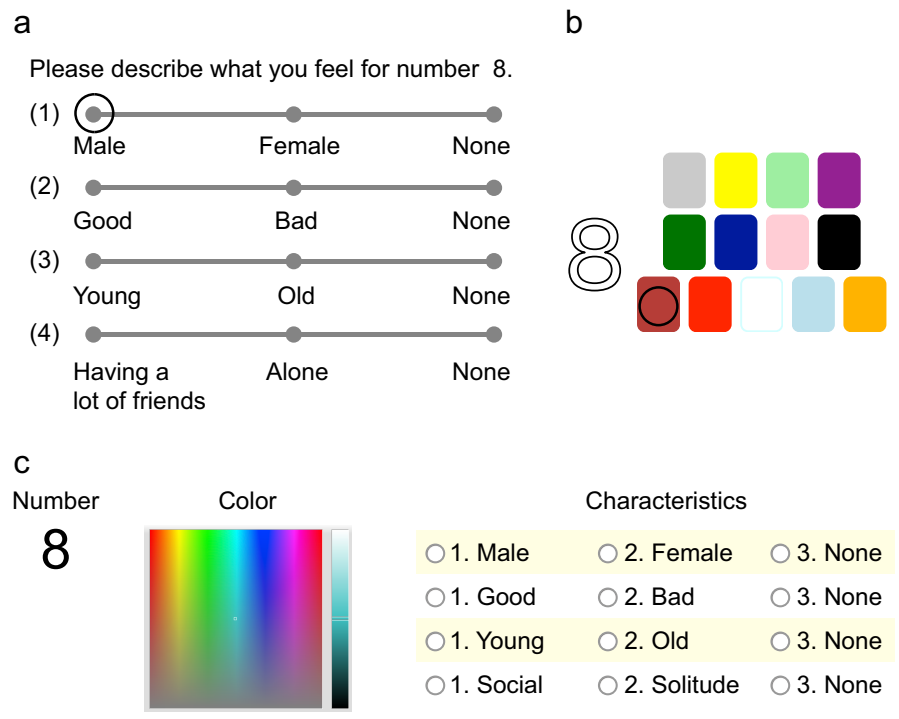

**Figure S1. Appearance of the questionnaire.** a & b: Paper-based test for the child study, where a: items ask personality, and b: items ask colour of the number '8'. c: Computer interface for the adult study. Numbers 0–9 were presented in a randomized order.
